# Supplementary material
Source: publisher figshare collection journal article supplement (https://gsajournals.figshare.com/ndownloader/files/27743280)
Supplement: Supplementary file 1 [file 27743280]

| **Table S10.** Gained genes in the genome of the smelt compared with other species. | | | |
| --- | --- | --- | --- |
| Compared Genomes | Human (*Homo sapiens*) | Zebrafish (*Danio rerio*) | Atlantic salmon (*Salmo salar*) |
| Compared Genes* | 20,644 | 20,644 | 20,644 |
| Cov* < 10% | 1,133 (5.49%) | 1,670 (8.09%) | 229 (1.11%) |
| Cov < 15% | 1,911 (9.26%) | 2,484 (12.03%) | 362 (1.75%) |
| *Compared Genomes contains only protein coding sequences. | | |  |
| *Cov means coverage. | |  |  |
